# Supplementary material for: Syntheses, structures and luminescent properties of lithium(i)-sulfonate complexes constructed from ortho-hydroxyl arenedisulfonic acids: structural evolution tuned by the pH, coordination geometry and modes
Source: Royal Society of Chemistry journal article supplement (doi:10.1039/c2ce25292a), 2012-01-01
Supplement: c2ce25292a.pdf [file c2ce25292a.pdf]

Electronic Supplementary Information for CrystEngComm

This journal is (c) The Royal Society of Chemistry 2012

Electronic Supplementary Information (ESI)

**Syntheses, structures and luminescent properties of  
lithium(I)-sulfonate complexes constructed from  
*ortho*-hydroxyl arenedisulfonic acids: structural evolutions  
tuned by pH value, coordination geometry and modes**

Wang Wan, Zhi-Biao Zhu, Li-Hua Huo, Zhao-Peng Deng,<sup>\*</sup> Hui Zhao and Shan Gao<sup>\*</sup>

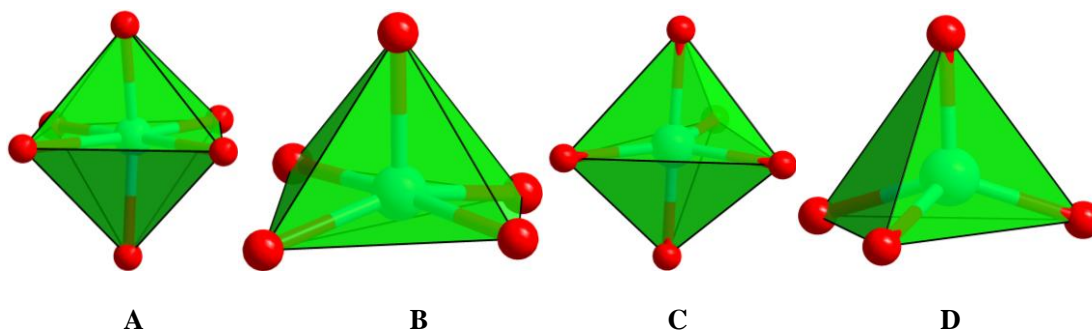

**Scheme S1.** Observed polyhedra in complexes **1 (A)**, **2 (B)**, **3 (A, B, C, D)**, **4 (D)**, **5 (A, D)**, **6 (C, D)**.

Electronic Supplementary Information for CrystEngComm

This journal is (c) The Royal Society of Chemistry 2012

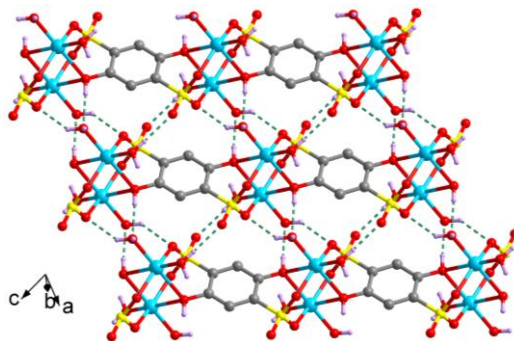

**Figure S1.** 2-D hydrogen-bonding layer of complex **1** in the *ac* plane.

The regular 3-D supramolecular network of complex **1** can be understood in the following manners. Firstly, the O2, O3 and O4 atoms of  $\text{H}_2\text{L1}^{2-}$  dianions form hydrogen bonds with H1w1, H2w2 and O2w of coordinated water molecules to generate 2-D hydrogen-bonding layer in the *ac* plane (Fig. S1, Table S2). Subsequently, the H1w2 and H2w1 of coordinated water molecules form hydrogen bonds with the O2, O3 and O4 atoms of  $\text{H}_2\text{L1}^{2-}$  dianions in the adjacent layers, thus giving rise to the 3-D supramolecular network (Fig. 1c, Table S2).

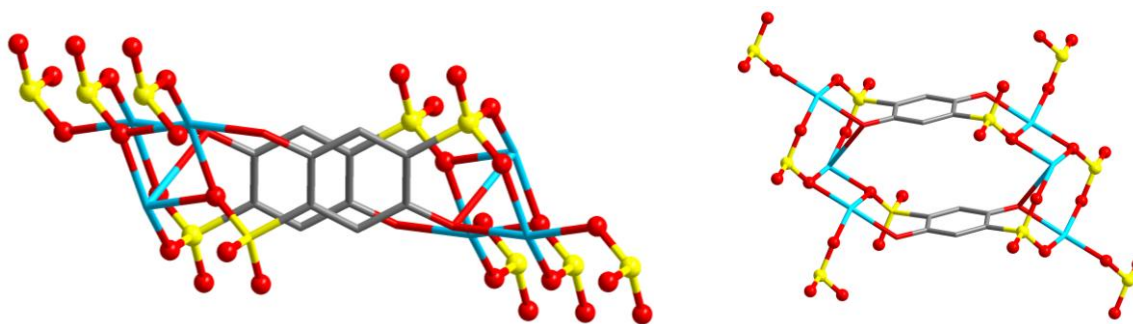

**Figure S2.** Side view (left) and planform (right) of the pseudo-sulfocalixarene motif in the layer of complex **2**.

Electronic Supplementary Information for CrystEngComm

This journal is (c) The Royal Society of Chemistry 2012

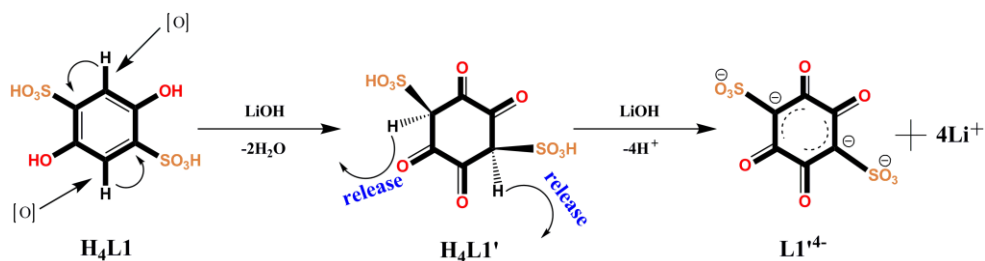

**Figure S3.** *In situ* formation of  $H_4L1'$ .

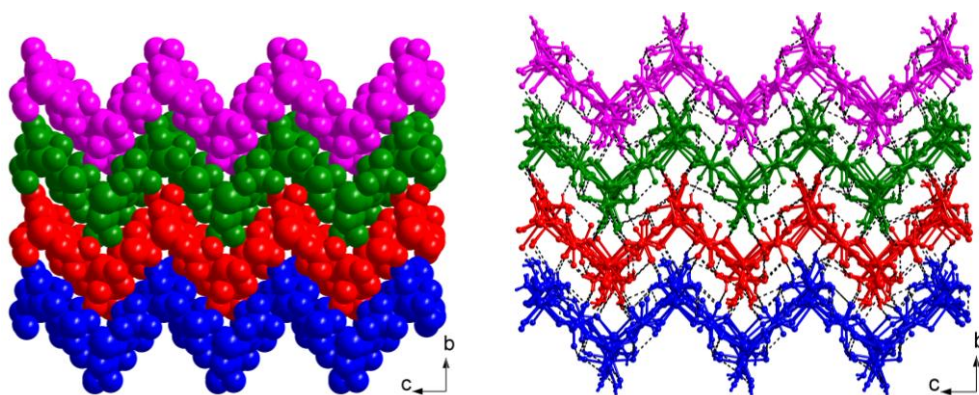

**Figure S4.** Representation of the 3-D supramolecular network of complex **3** extended by the hydrogen bonds (denoted as black dashed lines). Different layer was denoted as different color.

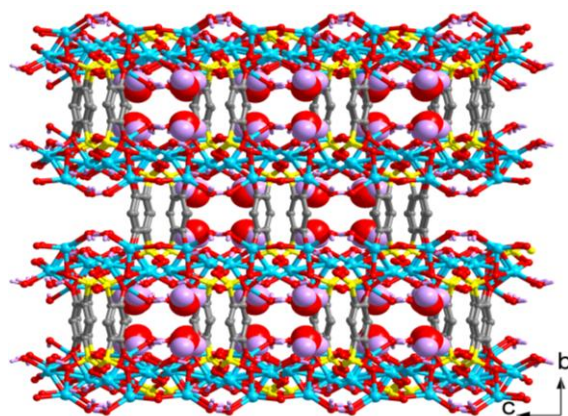

**Figure S5.** Illustration of the 3-D pillared layered structure along the  $a$ -axis with channels filled by free water molecules.

Electronic Supplementary Information for CrystEngComm

This journal is (c) The Royal Society of Chemistry 2012

### **Powder X-ray diffraction (PXRD)**

Powder X-ray diffraction (PXRD) patterns for solid samples of **1**, **2** and **4-6** are measured at room temperature as illustrated in Figure S6. The patterns are highly similar to their simulated ones (based on the single-crystal X-ray diffraction data), indicating that the single-crystal structures are really representative of the bulk of the corresponding samples.

### **Thermogravimetric analysis**

To examine the thermal stability of the complexes, in this study, their stabilities were analyzed on crystalline samples by thermogravimetric analyses (TGA) from room temperature to 800 °C at a rate of 10 °C min<sup>-1</sup>, under N<sub>2</sub> atmosphere. As shown in Figure S7, the TGA curve indicates that complex **1** loses the coordinated water molecules from 50 to 126 °C with the observed weight loss of 20.64% (calcd 20.35%). Then, one sharp step corresponding to the loss of the organic components occurs in the temperature range 360 - 465 °C. Complex **2** loses the coordinated water molecules from 60 to 140 °C with the observed weight loss of 11.58% (calcd 11.33%). The organic components are then removed progressively from 365 to 760 °C. The sharp weight loss in complex **4** between 37 and 70 °C corresponds to the removal of the free NH<sub>4</sub><sup>+</sup> cations (obsd 6.57%, calcd 6.15%). Then, the organic components are removed progressively from 306 to 555 °C. Complex **5** can stable up to 103 °C, at which one free and one coordinated water molecules begin to gradually decompose and complete at 155 °C (obsd 11.68%, calcd 11.33%). The following gradually weight loss from 380 °C corresponds to the loss of the organic components. For complex **6**, the first sharp step between 35 and 150 °C corresponds to the release of one free and two coordinated water molecules with the observed weight loss of 26.56% (calcd 26.89%). Then, the following weight loss with the decomposing of organic components occurs in the temperature range 350 - 545 °C.

Electronic Supplementary Information for CrystEngComm

This journal is (c) The Royal Society of Chemistry 2012

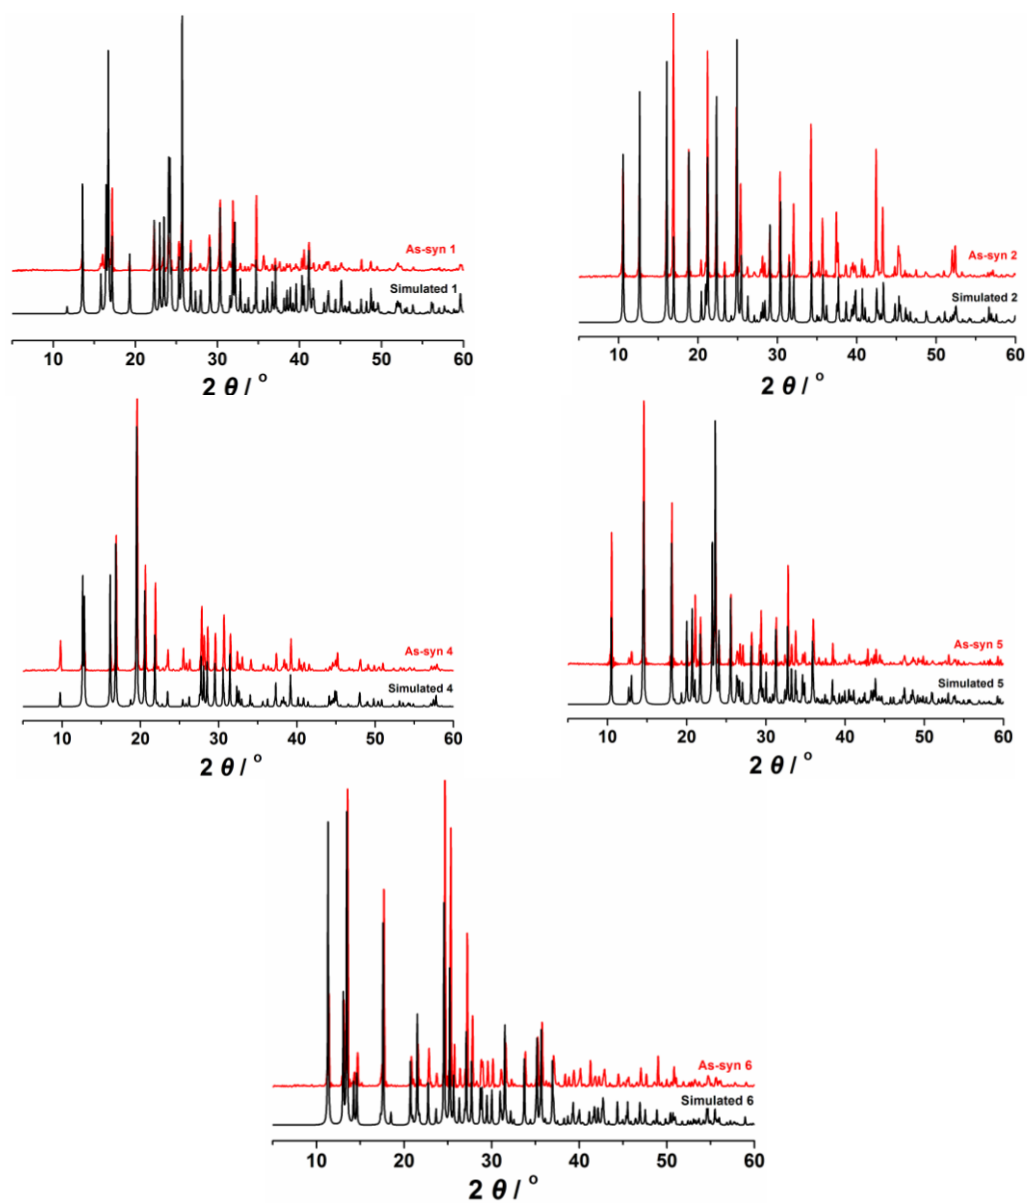

**Figure S6.** PXR D patterns for complexes 1, 2 and 4-6.

Electronic Supplementary Information for CrystEngComm

This journal is (c) The Royal Society of Chemistry 2012

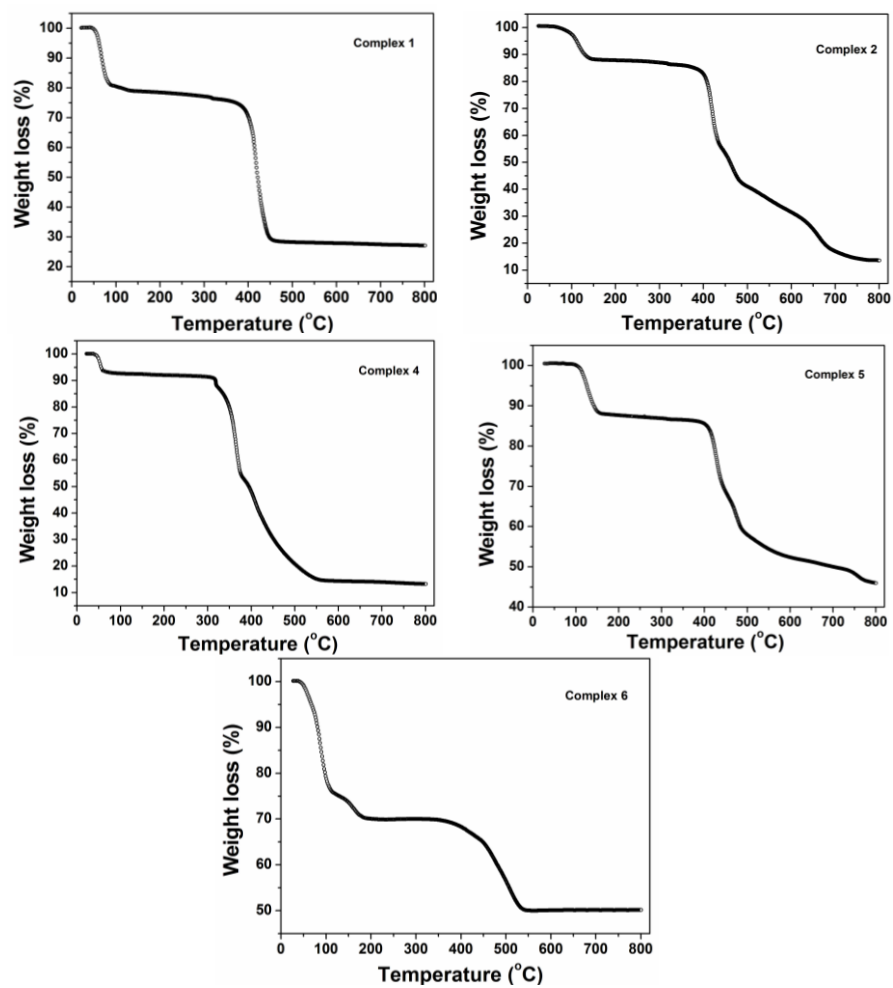

Figure S7. TG curves of complexes 1, 2 and 4-6.

Electronic Supplementary Information for CrystEngComm

This journal is (c) The Royal Society of Chemistry 2012

**Table S1** Selected Bond Distances (Å) and Angles (°) for Complexes **1-6**<sup>a</sup>

| Complex <b>1</b>                            |           |                                               |           |
|---------------------------------------------|-----------|-----------------------------------------------|-----------|
| Li(1)-O(1W)                                 | 1.979(5)  | Li(1)-O(2) <sup>i</sup>                       | 2.095(5)  |
| Li(1)-O(1)                                  | 2.070(5)  | Li(1)-O(4) <sup>ii</sup>                      | 2.394(5)  |
| Li(1)-O(2W)                                 | 2.077(5)  | Li(1)-O(4) <sup>iii</sup>                     | 2.479(5)  |
| O(1W)-Li(1)-O(1)                            | 97.7(2)   | O(2W)-Li(1)-O(4) <sup>ii</sup>                | 178.5(2)  |
| O(1W)-Li(1)-O(2W)                           | 92.8(2)   | O(2) <sup>i</sup> -Li(1)-O(4) <sup>ii</sup>   | 81.63(17) |
| O(1)-Li(1)-O(2W)                            | 97.0(2)   | O(1W)-Li(1)-O(4) <sup>iii</sup>               | 176.1(2)  |
| O(1W)-Li(1)-O(2) <sup>i</sup>               | 103.7(2)  | O(1)-Li(1)-O(4) <sup>iii</sup>                | 78.99(16) |
| O(1)-Li(1)-O(2) <sup>i</sup>                | 153.6(3)  | O(2W)-Li(1)-O(4) <sup>iii</sup>               | 85.66(18) |
| O(2W)-Li(1)-O(2) <sup>i</sup>               | 97.2(2)   | O(2) <sup>i</sup> -Li(1)-O(4) <sup>iii</sup>  | 80.04(16) |
| O(1W)-Li(1)-O(4) <sup>ii</sup>              | 88.39(19) | O(4) <sup>ii</sup> -Li(1)-O(4) <sup>iii</sup> | 93.22(17) |
| O(1)-Li(1)-O(4) <sup>ii</sup>               | 83.69(17) |                                               |           |
| Complex <b>2</b>                            |           |                                               |           |
| Li(1)-O(2) <sup>i</sup>                     | 2.000(5)  | Li(1)-O(1)                                    | 2.099(5)  |
| Li(1)-O(1W)                                 | 2.019(5)  | Li(1)-O(4)                                    | 2.203(5)  |
| Li(1)-O(1) <sup>ii</sup>                    | 2.045(5)  |                                               |           |
| O(2) <sup>i</sup> -Li(1)-O(1W)              | 102.8(2)  | O(1) <sup>ii</sup> -Li(1)-O(1)                | 86.27(19) |
| O(2) <sup>i</sup> -Li(1)-O(1) <sup>ii</sup> | 103.2(2)  | O(2) <sup>i</sup> -Li(1)-O(4)                 | 83.76(18) |
| O(1W)-Li(1)-O(1) <sup>ii</sup>              | 95.9(2)   | O(1W)-Li(1)-O(4)                              | 92.9(2)   |
| O(2) <sup>i</sup> -Li(1)-O(1)               | 153.0(3)  | O(1) <sup>ii</sup> -Li(1)-O(4)                | 167.3(3)  |
| O(1W)-Li(1)-O(1)                            | 101.2(2)  | O(1)-Li(1)-O(4)                               | 82.99(19) |
| Complex <b>3</b>                            |           |                                               |           |

|                                |           |                                 |           |
|--------------------------------|-----------|---------------------------------|-----------|
| Li(1)-O(1W)                    | 1.965(12) | Li(4)-C(7) <sup>ii</sup>        | 2.750(12) |
| Li(1)-O(4)                     | 1.981(9)  | Li(4)-C(7)                      | 2.750(12) |
| Li(1)-O(1)                     | 2.041(13) | Li(5)-O(8W)                     | 1.829(15) |
| Li(1)-O(10) <sup>i</sup>       | 2.070(9)  | Li(5)-O(7W)                     | 2.085(10) |
| Li(1)-O(3) <sup>i</sup>        | 2.508(13) | Li(5)-O(7W) <sup>ii</sup>       | 2.085(10) |
| Li(1)-Li(2)                    | 3.133(14) | Li(5)-O(15) <sup>ii</sup>       | 2.113(9)  |
| Li(1)-Li(7) <sup>i</sup>       | 3.364(13) | Li(5)-O(15)                     | 2.113(9)  |
| Li(2)-O(2W)                    | 1.892(9)  | Li(5)-Li(6)                     | 3.152(8)  |
| Li(2)-O(3W)                    | 1.914(10) | Li(6)-O(15)                     | 1.976(7)  |
| Li(2)-O(4)                     | 2.026(9)  | Li(6)-O(9) <sup>iii</sup>       | 2.063(7)  |
| Li(2)-O(5)                     | 2.181(9)  | Li(6)-O(8) <sup>iii</sup>       | 2.134(8)  |
| Li(2)-O(1W)                    | 2.337(11) | Li(6)-O(9W)                     | 2.185(8)  |
| Li(3)-O(4W)                    | 1.902(6)  | Li(6)-O(7W)                     | 2.223(9)  |
| Li(3)-O(5)                     | 2.023(7)  | Li(6)-O(13)                     | 2.328(10) |
| Li(3)-O(11)                    | 2.043(7)  | Li(6)-Li(7) <sup>iii</sup>      | 3.220(9)  |
| Li(3)-O(6)                     | 2.047(9)  | Li(7)-O(11W)                    | 2.012(10) |
| Li(3)-O(12)                    | 2.105(8)  | Li(7)-O(10W)                    | 2.030(8)  |
| Li(3)-Li(4)                    | 3.334(8)  | Li(7)-O(10)                     | 2.067(8)  |
| Li(4)-O(5W)                    | 1.948(15) | Li(7)-O(9)                      | 2.092(8)  |
| Li(4)-O(6W)                    | 1.973(13) | Li(7)-O(9W) <sup>iv</sup>       | 2.154(9)  |
| Li(4)-O(11)                    | 2.002(9)  |                                 |           |
| Li(4)-O(11) <sup>ii</sup>      | 2.002(9)  |                                 |           |
| O(1W)-Li(1)-O(4)               | 82.6(4)   | O(5W)-Li(4)-C(7)                | 121.5(6)  |
| O(1W)-Li(1)-O(1)               | 148.3(8)  | O(6W)-Li(4)-C(7)                | 123.3(6)  |
| O(4)-Li(1)-O(1)                | 86.4(4)   | O(11)-Li(4)-C(7)                | 24.81(18) |
| O(1W)-Li(1)-O(10) <sup>i</sup> | 98.7(5)   | O(11) <sup>ii</sup> -Li(4)-C(7) | 57.0(3)   |



|                                             |          |                                                |           |
|---------------------------------------------|----------|------------------------------------------------|-----------|
| O(4)-Li(1)-O(10) <sup>i</sup>               | 177.7(7) | C(7) <sup>ii</sup> -Li(4)-C(7)                 | 32.81(18) |
| O(1)-Li(1)-O(10) <sup>i</sup>               | 93.4(4)  | O(8W)-Li(5)-O(7W)                              | 105.0(4)  |
| O(1W)-Li(1)-O(3) <sup>i</sup>               | 118.8(7) | O(8W)-Li(5)-O(7W) <sup>ii</sup>                | 105.0(4)  |
| O(4)-Li(1)-O(3) <sup>i</sup>                | 91.8(4)  | O(7W)-Li(5)-O(7W) <sup>ii</sup>                | 101.9(7)  |
| O(1)-Li(1)-O(3) <sup>i</sup>                | 91.1(5)  | O(8W)-Li(5)-O(15) <sup>ii</sup>                | 107.4(7)  |
| O(10) <sup>i</sup> -Li(1)-O(3) <sup>i</sup> | 85.9(4)  | O(7W)-Li(5)-O(15) <sup>ii</sup>                | 144.8(6)  |
| O(2W)-Li(2)-O(3W)                           | 116.6(5) | O(7W) <sup>ii</sup> -Li(5)-O(15) <sup>ii</sup> | 82.7(2)   |
| O(2W)-Li(2)-O(4)                            | 120.3(5) | O(8W)-Li(5)-O(15)                              | 107.4(7)  |
| O(3W)-Li(2)-O(4)                            | 122.2(4) | O(7W)-Li(5)-O(15)                              | 82.7(2)   |
| O(2W)-Li(2)-O(5)                            | 96.5(4)  | O(7W) <sup>ii</sup> -Li(5)-O(15)               | 144.8(6)  |
| O(3W)-Li(2)-O(5)                            | 108.6(5) | O(15) <sup>ii</sup> -Li(5)-O(15)               | 74.9(4)   |
| O(4)-Li(2)-O(5)                             | 74.8(3)  | O(15)-Li(6)-O(9) <sup>iii</sup>                | 175.4(5)  |
| O(2W)-Li(2)-O(1W)                           | 94.9(5)  | O(15)-Li(6)-O(8) <sup>iii</sup>                | 99.2(3)   |
| O(3W)-Li(2)-O(1W)                           | 93.2(4)  | O(9) <sup>iii</sup> -Li(6)-O(8) <sup>iii</sup> | 83.7(3)   |
| O(4)-Li(2)-O(1W)                            | 72.9(3)  | O(15)-Li(6)-O(9W)                              | 96.4(4)   |
| O(5)-Li(2)-O(1W)                            | 147.3(5) | O(9) <sup>iii</sup> -Li(6)-O(9W)               | 80.5(2)   |
| O(4W)-Li(3)-O(5)                            | 97.9(3)  | O(8) <sup>iii</sup> -Li(6)-O(9W)               | 164.0(3)  |
| O(4W)-Li(3)-O(11)                           | 92.2(3)  | O(15)-Li(6)-O(7W)                              | 82.4(2)   |
| O(5)-Li(3)-O(11)                            | 169.4(3) | O(9) <sup>iii</sup> -Li(6)-O(7W)               | 101.2(4)  |
| O(4W)-Li(3)-O(6)                            | 107.7(4) | O(8) <sup>iii</sup> -Li(6)-O(7W)               | 88.6(4)   |
| O(5)-Li(3)-O(6)                             | 85.2(3)  | O(9W)-Li(6)-O(7W)                              | 97.0(3)   |
| O(11)-Li(3)-O(6)                            | 95.0(3)  | O(15)-Li(6)-O(13)                              | 83.4(4)   |
| O(4W)-Li(3)-O(12)                           | 111.0(4) | O(9) <sup>iii</sup> -Li(6)-O(13)               | 93.1(3)   |
| O(5)-Li(3)-O(12)                            | 91.0(3)  | O(8) <sup>iii</sup> -Li(6)-O(13)               | 89.6(3)   |
| O(11)-Li(3)-O(12)                           | 82.2(3)  | O(9W)-Li(6)-O(13)                              | 88.7(4)   |
| O(6)-Li(3)-O(12)                            | 141.2(3) | O(7W)-Li(6)-O(13)                              | 165.2(3)  |
| O(5W)-Li(4)-O(6W)                           | 112.1(6) | O(11W)-Li(7)-O(10W)                            | 102.8(4)  |

|                                               |            |                                              |            |
|-----------------------------------------------|------------|----------------------------------------------|------------|
| O(5W)-Li(4)-O(11)                             | 108.3(5)   | O(11W)-Li(7)-O(10)                           | 89.5(4)    |
| O(6W)-Li(4)-O(11)                             | 121.9(6)   | O(10W)-Li(7)-O(10)                           | 108.9(4)   |
| O(5W)-Li(4)-O(11) <sup>ii</sup>               | 108.3(5)   | O(11W)-Li(7)-O(9)                            | 146.8(4)   |
| O(6W)-Li(4)-O(11) <sup>ii</sup>               | 121.9(6)   | O(10W)-Li(7)-O(9)                            | 110.2(4)   |
| O(11)-Li(4)-O(11) <sup>ii</sup>               | 80.0(5)    | O(10)-Li(7)-O(9)                             | 76.7(3)    |
| O(5W)-Li(4)-C(7) <sup>ii</sup>                | 121.5(6)   | O(11W)-Li(7)-O(9W) <sup>iv</sup>             | 99.1(5)    |
| O(6W)-Li(4)-C(7) <sup>ii</sup>                | 123.3(6)   | O(10W)-Li(7)-O(9W) <sup>iv</sup>             | 97.4(4)    |
| O(11)-Li(4)-C(7) <sup>ii</sup>                | 57.0(3)    | O(10)-Li(7)-O(9W) <sup>iv</sup>              | 149.7(3)   |
| O(11) <sup>ii</sup> -Li(4)-C(7) <sup>ii</sup> | 24.81(18)  | O(9)-Li(7)-O(9W) <sup>iv</sup>               | 80.5(3)    |
| Complex 4                                     |            |                                              |            |
| Li(1)-O(2) <sup>ii</sup>                      | 1.9291(19) | Li(1)-O(1)                                   | 1.9359(19) |
| O(2) <sup>i</sup> -Li(1)-O(2) <sup>ii</sup>   | 113.12(16) | O(2) <sup>ii</sup> -Li(1)-O(1)               | 110.30(5)  |
| O(2) <sup>i</sup> -Li(1)-O(1)                 | 105.55(5)  | O(1) <sup>iii</sup> -Li(1)-O(1)              | 112.15(15) |
| Complex 5                                     |            |                                              |            |
| Li(1)-O(1)                                    | 2.018(4)   | Li(1)-O(8) <sup>ii</sup>                     | 2.468(5)   |
| Li(1)-O(3) <sup>i</sup>                       | 2.026(4)   | Li(2)-O(2)                                   | 1.902(4)   |
| Li(1)-O(1W)                                   | 2.079(4)   | Li(2)-O(6) <sup>iv</sup>                     | 1.961(4)   |
| Li(1)-O(4)                                    | 2.155(4)   | Li(2)-O(7) <sup>v</sup>                      | 1.964(4)   |
| Li(1)-O(7) <sup>ii</sup>                      | 2.278(5)   | Li(2)-O(3) <sup>vi</sup>                     | 1.993(4)   |
| O(1)-Li(1)-O(3) <sup>i</sup>                  | 122.1(2)   | O(3) <sup>i</sup> -Li(1)-O(8) <sup>ii</sup>  | 155.7(2)   |
| O(1)-Li(1)-O(1W)                              | 92.01(18)  | O(1W)-Li(1)-O(8) <sup>ii</sup>               | 81.01(15)  |
| O(3) <sup>i</sup> -Li(1)-O(1W)                | 96.55(18)  | O(4)-Li(1)-O(8) <sup>ii</sup>                | 96.44(16)  |
| O(1)-Li(1)-O(4)                               | 83.68(16)  | O(7) <sup>ii</sup> -Li(1)-O(8) <sup>ii</sup> | 76.28(14)  |
| O(3) <sup>i</sup> -Li(1)-O(4)                 | 87.41(17)  | O(2)-Li(2)-O(6) <sup>iv</sup>                | 105.38(19) |
| O(1W)-Li(1)-O(4)                              | 175.3(2)   | O(2)-Li(2)-O(7) <sup>v</sup>                 | 109.7(2)   |

|                                                                                                                                                                                                                                                                                                                                                                                                                                                                                                                                 |            |                                              |            |
|---------------------------------------------------------------------------------------------------------------------------------------------------------------------------------------------------------------------------------------------------------------------------------------------------------------------------------------------------------------------------------------------------------------------------------------------------------------------------------------------------------------------------------|------------|----------------------------------------------|------------|
| O(1)-Li(1)-O(7) <sup>ii</sup>                                                                                                                                                                                                                                                                                                                                                                                                                                                                                                   | 157.3(2)   | O(6) <sup>iv</sup> -Li(2)-O(7) <sup>v</sup>  | 119.5(2)   |
| O(3) <sup>i</sup> -Li(1)-O(7) <sup>ii</sup>                                                                                                                                                                                                                                                                                                                                                                                                                                                                                     | 79.62(15)  | O(2)-Li(2)-O(3) <sup>vi</sup>                | 131.9(2)   |
| O(1W)-Li(1)-O(7) <sup>ii</sup>                                                                                                                                                                                                                                                                                                                                                                                                                                                                                                  | 91.75(17)  | O(6) <sup>iv</sup> -Li(2)-O(3) <sup>vi</sup> | 102.68(18) |
| O(4)-Li(1)-O(7) <sup>ii</sup>                                                                                                                                                                                                                                                                                                                                                                                                                                                                                                   | 91.50(17)  | O(7) <sup>v</sup> -Li(2)-O(3) <sup>vi</sup>  | 88.53(16)  |
| O(1)-Li(1)-O(8) <sup>ii</sup>                                                                                                                                                                                                                                                                                                                                                                                                                                                                                                   | 82.25(15)  |                                              |            |
| <b>Complex 6</b>                                                                                                                                                                                                                                                                                                                                                                                                                                                                                                                |            |                                              |            |
| Li(1)-O(4) <sup>i</sup>                                                                                                                                                                                                                                                                                                                                                                                                                                                                                                         | 1.926(3)   | Li(2)-O(4)                                   | 2.027(4)   |
| Li(1)-O(2) <sup>ii</sup>                                                                                                                                                                                                                                                                                                                                                                                                                                                                                                        | 1.931(4)   | Li(2)-O(4) <sup>i</sup>                      | 2.056(4)   |
| Li(1)-O(1)                                                                                                                                                                                                                                                                                                                                                                                                                                                                                                                      | 1.953(3)   | Li(2)-O(3) <sup>i</sup>                      | 2.083(4)   |
| Li(1)-O(1W)                                                                                                                                                                                                                                                                                                                                                                                                                                                                                                                     | 1.995(4)   | Li(2)-O(1)                                   | 2.532(4)   |
| Li(2)-O(2W)                                                                                                                                                                                                                                                                                                                                                                                                                                                                                                                     | 1.944(4)   | Li(2)-Li(2) <sup>i</sup>                     | 2.554(7)   |
| O(4) <sup>i</sup> -Li(1)-O(2) <sup>ii</sup>                                                                                                                                                                                                                                                                                                                                                                                                                                                                                     | 112.61(17) | O(4)-Li(2)-O(4) <sup>i</sup>                 | 102.54(15) |
| O(4) <sup>i</sup> -Li(1)-O(1)                                                                                                                                                                                                                                                                                                                                                                                                                                                                                                   | 96.13(14)  | O(2W)-Li(2)-O(3) <sup>i</sup>                | 96.42(16)  |
| O(2) <sup>ii</sup> -Li(1)-O(1)                                                                                                                                                                                                                                                                                                                                                                                                                                                                                                  | 98.01(15)  | O(4)-Li(2)-O(3) <sup>i</sup>                 | 102.61(17) |
| O(4) <sup>i</sup> -Li(1)-O(1W)                                                                                                                                                                                                                                                                                                                                                                                                                                                                                                  | 115.79(17) | O(4) <sup>i</sup> -Li(2)-O(3) <sup>i</sup>   | 92.14(14)  |
| O(2) <sup>ii</sup> -Li(1)-O(1W)                                                                                                                                                                                                                                                                                                                                                                                                                                                                                                 | 114.35(16) | O(2W)-Li(2)-O(1)                             | 89.32(14)  |
| O(1)-Li(1)-O(1W)                                                                                                                                                                                                                                                                                                                                                                                                                                                                                                                | 117.38(17) | O(4)-Li(2)-O(1)                              | 84.27(13)  |
| O(2W)-Li(2)-O(4)                                                                                                                                                                                                                                                                                                                                                                                                                                                                                                                | 112.76(17) | O(4) <sup>i</sup> -Li(2)-O(1)                | 77.16(13)  |
| O(2W)-Li(2)-O(4) <sup>i</sup>                                                                                                                                                                                                                                                                                                                                                                                                                                                                                                   | 140.7(2)   | O(3) <sup>i</sup> -Li(2)-O(1)                | 168.42(17) |
| <p><sup>a</sup> Symmetry transformations used to generate equivalent atoms: (i) -x+2,-y,-z+2; (ii) x+1,y,z-1; (iii) -x+1,-y,-z+3 for <b>1</b>; (i) -x+1,-y+1,-z+2; (ii) -x,-y+1,-z+2 for <b>2</b>; (i) -x+1/2,-y+1/2,z+1/2; (ii) -x,y,z; (iii) x,y,z+1; (iv) x,y,z-1 for <b>3</b>; (i) -x+1/2,y-1/2,z; (ii) x,y-1/2,-z+3/2; (iii) -x+1/2,y+0,-z+3/2 for <b>4</b>; (i) -x,-y,-z+2; (ii) -x+1,-y,-z+1; (iv) x,y,z+1; (v) -x+1,-y+1,-z+1; (vi) -x,-y+1,-z+2 for <b>5</b>; (i) -x+1,-y,-z-1; (ii) -x+1/2,-y,z+1/2 for <b>6</b>.</p> |            |                                              |            |

Electronic Supplementary Information for CrystEngComm

This journal is (c) The Royal Society of Chemistry 2012

**Table S2** Selected Hydrogen Bond Parameters for Complexes **1-6**<sup>a</sup>

| D-H...A                              | d(H...A) /Å | d(D...A) /Å | <(DHA)/°  |
|--------------------------------------|-------------|-------------|-----------|
| <b>Complex 1</b>                     |             |             |           |
| O(1W)-H(1W1)...O(3) <sup>v</sup>     | 2.09(3)     | 2.934(3)    | 175(4)    |
| O(1W)-H(1W2)...O(3) <sup>vi</sup>    | 2.05(3)     | 2.895(3)    | 172(3)    |
| O(2W)-H(2W1)...O(1) <sup>vii</sup>   | 1.92(3)     | 2.764(3)    | 172(3)    |
| O(2W)-H(2W2)...O(2) <sup>viii</sup>  | 2.16(2)     | 2.883(3)    | 143(3)    |
| O(4)-H(4O)...O(2W) <sup>ix</sup>     | 1.89(3)     | 2.730(3)    | 168(3)    |
| <b>Complex 2</b>                     |             |             |           |
| O(1W)-H(1W1)...O(2) <sup>iv</sup>    | 1.94(3)     | 2.755(3)    | 161(3)    |
| O(1W)-H(1W2)...O(3) <sup>v</sup>     | 2.03(2)     | 2.794(3)    | 149(3)    |
| O(4)-H(4O)...O(1W) <sup>vi</sup>     | 1.93(3)     | 2.762(3)    | 168(4)    |
| <b>Complex 3</b>                     |             |             |           |
| O(1W)-H(1W1)...O(3W)                 | 2.33(8)     | 3.101(6)    | 152(15)   |
| O(1W)-H(1W1)...O(2W)                 | 2.57(12)    | 3.130(10)   | 125(12)   |
| O(1W)-H(1W2)...O(3) <sup>vi</sup>    | 2.34(16)    | 2.869(7)    | 121(15)   |
| O(2W)-H(2W1)...O(2) <sup>i</sup>     | 2.24(3)     | 2.990(5)    | 149(5)    |
| O(2W)-H(2W2)...O(12)                 | 2.27(4)     | 2.852(4)    | 126(4)    |
| O(2W)-H(2W2)...O(3W) <sup>vi</sup>   | 2.65(4)     | 3.134(5)    | 118(3)    |
| O(3W)-H(3W1)...O(1) <sup>vii</sup>   | 2.26(3)     | 3.061(6)    | 156(5)    |
| O(3W)-H(3W2)...O(13) <sup>viii</sup> | 2.17(3)     | 2.942(4)    | 150(6)    |
| O(4W)-H(4W1)...O(8) <sup>vi</sup>    | 2.089(12)   | 2.935(5)    | 175(6)    |
| O(4W)-H(4W2)...O(5)                  | 2.37(5)     | 2.961(5)    | 128(5)    |
| O(5W)-H(5W)...O(6)                   | 2.062(7)    | 2.916(3)    | 174.5(17) |
| O(6W)-H(6W)...O(8) <sup>ix</sup>     | 1.98        | 2.832(3)    | 175.9     |

|                                     |          |            |           |
|-------------------------------------|----------|------------|-----------|
| O(7W)-H(7W1)...O(14) <sup>x</sup>   | 2.11(3)  | 2.847(4)   | 145(5)    |
| O(7W)-H(7W2)...O(7) <sup>iii</sup>  | 2.39(3)  | 3.123(6)   | 144(4)    |
| O(8W)-H(8W)...O(7) <sup>xi</sup>    | 2.12(5)  | 2.722(4)   | 128(6)    |
| O(9W)-H(9W1)...O(7) <sup>x</sup>    | 1.97(3)  | 2.734(5)   | 150(5)    |
| O(9W)-H(9W2)...O(14)                | 2.13(3)  | 2.902(5)   | 151(6)    |
| O(10W)-HAW2...O(3) <sup>xii</sup>   | 2.36(7)  | 2.935(5)   | 125(7)    |
| O(10W)-HAW1...O(14) <sup>xiii</sup> | 2.04(4)  | 2.839(4)   | 155(8)    |
| O(11W)-HBW2...O(9W) <sup>iv</sup>   | 2.58(11) | 3.172(11)  | 127(12)   |
| O(11W)-HBW1...O(1) <sup>v</sup>     | 2.06(8)  | 2.822(8)   | 147(12)   |
| <b>Complex 4</b>                    |          |            |           |
| O(4)-H(4O)...O(3) <sup>vi</sup>     | 1.88(2)  | 2.704(2)   | 166(2)    |
| N(1)-H(1N1)...O(1)                  | 2.00(2)  | 2.834(2)   | 160.8(19) |
| N(1)-H(1N2)...O(2) <sup>vii</sup>   | 2.20(2)  | 2.868(2)   | 135.3(18) |
| N(1)-H(1N2)...O(4) <sup>vii</sup>   | 2.44(2)  | 3.171(2)   | 144.6(17) |
| <b>Complex 5</b>                    |          |            |           |
| O(1W)-H(1W2)...O(5) <sup>ix</sup>   | 2.06(2)  | 2.883(2)   | 166(2)    |
| O(1W)-H(1W1)...O(1) <sup>x</sup>    | 2.25(2)  | 2.981(2)   | 144(3)    |
| O(2W)-H(2W2)...O(5) <sup>iii</sup>  | 2.05(3)  | 2.886(3)   | 173(3)    |
| O(2W)-H(2W1)...O(6) <sup>xi</sup>   | 2.09(2)  | 2.933(3)   | 172(3)    |
| O(4)-H(4O)...O(2W)                  | 1.76(2)  | 2.611(2)   | 177(3)    |
| O(8)-H(8O)...O(1W) <sup>viii</sup>  | 1.90(2)  | 2.732(2)   | 169(3)    |
| <b>Complex 6</b>                    |          |            |           |
| O(1W)-H(1W1)...O(2W) <sup>iii</sup> | 2.02     | 2.818(2)   | 164.5     |
| O(1W)-H(1W2)...O(3W) <sup>v</sup>   | 2.06     | 2.861(2)   | 164.6     |
| O(2W)-H(2W1)...O(3) <sup>vi</sup>   | 1.97     | 2.789(2)   | 174.4     |
| O(2W)-H(2W2)...O(3) <sup>i</sup>    | 2.19     | 3.0033(19) | 174.6     |
| O(3W)-H(3W1)...O(2) <sup>ii</sup>   | 2.08     | 2.897(2)   | 170.5     |

O(3W)-H(3W2)...O(2W)<sup>vii</sup>                      2.05                      2.866(2)                      170.5

---

<sup>a</sup> Symmetry transformations used to generate equivalent atoms: (v)  $x,y,z-1$ ; (vi)  $-x+2,-y+1,-z+2$ ; (vii)  $-x+1,-y+1,-z+2$ ; (viii)  $x-1,y,z$ ; (ix)  $x,y,z+1$  for **1**; (iv)  $x-1,y-1,z$ ; (v)  $x,y-1,z$ ; (vi)  $x+1,y,z$  for **2**; (i)  $-x+1/2,-y+1/2,z+1/2$ ; (iv)  $x,y,z-1$ ; (v)  $-x+1/2,-y+1/2,z-1/2$ ; (vi)  $x,-y,z+1/2$ ; (vii)  $-x+1/2,y-1/2,z$ ; (viii)  $x,-y,z-1/2$ ; (ix)  $-x,-y,z+1/2$ ; (x)  $x,-y+1,z+1/2$ ; (xi)  $-x,-y+1,z+1/2$ ; (xii)  $-x+1/2,y+1/2,z$ ; (xiii)  $x,-y+1,z-1/2$  for **3**; (vi)  $x,-y+3/2,z-1/2$ ; (vii)  $-x+1/2,-y+3/2,-z+1$  for **4**; (iii)  $x,y-1,z$ ; (viii)  $x,y,z-1$ ; (ix)  $x,y-1,z+1$ ; (x)  $-x+1,-y,-z+2$ ; (xi)  $-x,-y,-z+1$  for **5**; (i)  $-x+1,-y,-z-1$ ; (ii)  $-x+1/2,-y,z+1/2$ ; (iii)  $-x+1/2,-y,z-1/2$ ; (v)  $x,y,z-1$ ; (vi)  $x,y,z+1$ ; (vii)  $-x+1,-y,-z$  for **6**.

---
